# Supplementary material for: Resistance to Leaf and Yellow Rust in a Collection of Spanish Bread Wheat Landraces and Association with Ecogeographical Variables
Source: MDPI journal article supplement (doi:10.3390/agronomy12010187), 2022-01-13
Supplement: s1 [file s1]

**Table S1.** Ecogeographical variables considered in the characterization of the bread wheat landraces obtained from various sources compiled by CAPFITOGEN [27].

| Ecogeographic component | Description                                                       | Abbreviation  | Unit     |
|-------------------------|-------------------------------------------------------------------|---------------|----------|
| Bioclimatic             | Monthly precipitation (January to June)                           | prec_1 to 12  | mm       |
|                         | Monthly mean temperature (January to June)                        | tmean_1 to 12 | °C       |
|                         | Monthly minimum temperature (January to June)                     | tmin_1 to 12  | °C       |
|                         | Monthly maximum temperature (January to June)                     | tmax_1 to 12  | °C       |
|                         | Annual mean temperature                                           | bio_1         | °C       |
|                         | Mean daily temperature range (Mean monthly (max temp - min temp)) | bio_2         | °C       |
|                         | Isothermality (bio_2/bio_7) (* 100)                               | bio_3         | -        |
|                         | Temperature seasonality (standard deviation *100)                 | bio_4         | -        |
|                         | Maximum temperature of hottest month                              | bio_5         | °C       |
|                         | Minimum temperature of coldest month                              | bio_6         | °C       |
|                         | Annual temperature range (BIO5-BIO6)                              | bio_7         | °C       |
|                         | Mean temperature of wettest quarter                               | bio_8         | °C       |
|                         | Mean temperature of driest quarter                                | bio_9         | °C       |
|                         | Mean temperature of hottest quarter                               | bio_10        | °C       |
|                         | Mean temperature of coldest quarter                               | bio_11        | °C       |
|                         | Annual precipitation                                              | bio_12        | mm       |
|                         | Precipitation of wettest month                                    | bio_13        | mm       |
|                         | Precipitation of driest month                                     | bio_14        | mm       |
|                         | Precipitation seasonality (Coefficient of variation)              | bio_15        | mm       |
|                         | Precipitation of wettest quarter                                  | bio_16        | mm       |
|                         | Precipitation of driest quarter                                   | bio_17        | mm       |
|                         | Precipitation of hottest quarter                                  | bio_18        | mm       |
|                         | Precipitation of coldest quarter                                  | bio_19        | mm       |
| Geophysical             | Northness (1 if it faces northwards. - 1 if it faces southwards)  | northness     | °        |
|                         | Eastness (1 if it faces eastwards. - 1 if it faces westwards)     | eastness      | °        |
|                         | Altitude (meters above sea level)                                 | Alt           | m        |
| Edaphic                 | Topsoil clay fraction                                             | t_clay        | % weight |
|                         | Topsoil sand fraction                                             | t_sand        | % weight |
|                         | Subsoil clay content                                              | s_clay        | % weight |
|                         | Topsoil pH (H2O)                                                  | t_pH          | -log(H+) |
|                         | Topsoil reference bulk density                                    | bulk_density  | % weight |

**Table S3.** Means of the ecogeographical variables (see Table S1) ordered according to their significant differences ( $p < 0.05$ ) between resistant and susceptible landraces, based on their IT and DS values at the seedling stage for the leaf rust isolates Huesca 14 and Peralta García 14.

| Huesca 14 |              |           |             | Peralta García 14 |           |             |
|-----------|--------------|-----------|-------------|-------------------|-----------|-------------|
|           | Variable     | Resistant | Susceptible | Variable          | Resistant | Susceptible |
| IT        | bulk_density | 1.34      | 1.40        |                   |           |             |
| DS        | bulk_density | 1.34      | 1.41        | bio_13            | 94.11     | 65.9        |
|           |              |           |             | bio_16            | 250.4     | 175.46      |
|           |              |           |             | prec_3            | 63.94     | 48.3        |
|           |              |           |             | bio_12            | 723.14    | 540.98      |
|           |              |           |             | prec_10           | 74.46     | 53.35       |
|           |              |           |             | prec_9            | 55        | 40.8        |
|           |              |           |             | prec_12           | 80.24     | 54.02       |
|           |              |           |             | prec_2            | 61.95     | 42.88       |
|           |              |           |             | bio_19            | 208.34    | 141.28      |
|           |              |           |             | bio_4             | 53.72     | 60.81       |
|           |              |           |             | prec_4            | 65.46     | 53.74       |
|           |              |           |             | tmax_7            | 26.48     | 28.54       |
|           |              |           |             | bio_7             | 25.13     | 28.67       |
|           |              |           |             | bio_5             | 26.69     | 28.57       |
|           |              |           |             | bio_2             | 9.63      | 10.96       |
|           |              |           |             | bio_18            | 120       | 89.19       |
|           |              |           |             | prec_1            | 66.15     | 44.38       |
|           |              |           |             | tmax_8            | 26.38     | 28.03       |
|           |              |           |             | prec_8            | 35.61     | 24.49       |

**Table S5.** Means of the ecogeographical variables (see Table S1) ordered according to their significant differences ( $p < 0.05$ ) between resistant and susceptible landraces, based on their leaf rust severity at adult stage in field plots at three locations (Cordoba, Jerez, and Granada).

| Cordoba  |           |             | Jerez    |           |             | Granada  |           |             |
|----------|-----------|-------------|----------|-----------|-------------|----------|-----------|-------------|
| Variable | Resistant | Susceptible | Variable | Resistant | Susceptible | Variable | Resistant | Susceptible |
| bio_13   | 114.38    | 81.45       | t_clay   | 21.32     | 31.77       | prec_8   | 52.52     | 28.17       |
| prec_10  | 87.66     | 64.87       | t_pH     | 5.59      | 7.34        | prec_7   | 40.68     | 22.2        |
| bio_19   | 270.24    | 182.53      | prec_10  | 92.5      | 60.47       | bio_14   | 40.46     | 22.13       |
| prec_12  | 104.38    | 70.15       | bio_7    | 22.53     | 28.39       | bio_18   | 160.59    | 99.74       |
| bio_16   | 305.59    | 219.98      | bio_2    | 8.86      | 10.98       | bio_17   | 145.58    | 91.07       |
| prec_1   | 85.58     | 57.41       | bio_4    | 475.65    | 596.72      | tmax_8   | 23.75     | 27.49       |
| bio_12   | 858.33    | 640.99      | prec_9   | 64.24     | 45.1        | tmax_7   | 23.65     | 27.85       |
| prec_11  | 99.73     | 71.43       | bio_13   | 118.12    | 75.55       | tmax_6   | 20.79     | 24.04       |
| t_pH     | 5.99      | 6.94        | bio_16   | 314.43    | 204.06      | bio_5    | 23.99     | 27.96       |
| prec_4   | 72.8      | 59.42       | bio_12   | 890.8     | 609.04      | prec_4   | 80.1      | 59.67       |
| prec_2   | 80.28     | 54.96       | prec_11  | 108.72    | 66.65       | t_pH     | 5.65      | 6.91        |
| prec_3   | 84.86     | 59.09       | prec_1   | 85.87     | 51.04       | bio_4    | 468.66    | 577.08      |
|          |           |             | prec_2   | 79        | 50.81       | bio_7    | 22.18     | 27.27       |
|          |           |             | bio_19   | 268.67    | 166.23      | tmax_9   | 21.12     | 23.86       |
|          |           |             | tmin_2   | 2.97      | 0.28        | prec_9   | 66.38     | 47.72       |
|          |           |             | prec_12  | 103.8     | 64.39       | bio_12   | 890.59    | 649.08      |
|          |           |             | prec_4   | 77.8      | 57.35       | tmean_7  | 18.49     | 21.14       |
|          |           |             | tmin_1   | 2.36      | -0.26       | tmean_8  | 18.59     | 20.95       |
|          |           |             | prec_3   | 77.78     | 55.88       | bio_2    | 8.74      | 10.48       |
|          |           |             | bio_6    | 2.34      | -0.26       | bio_10   | 17.83     | 20.04       |
|          |           |             | bio_18   | 141.24    | 97.11       |          |           |             |
|          |           |             | tmax_7   | 24.52     | 28.1        |          |           |             |
|          |           |             | tmean_1  | 6.05      | 3.86        |          |           |             |
|          |           |             | tmin_12  | 3.09      | 0.84        |          |           |             |
|          |           |             | tmin_3   | 4.66      | 2.47        |          |           |             |
|          |           |             | bio_5    | 24.87     | 28.13       |          |           |             |
|          |           |             | bio_11   | 6.53      | 4.56        |          |           |             |
|          |           |             | tmin_10  | 8.92      | 6.94        |          |           |             |
|          |           |             | tmax_8   | 24.74     | 27.57       |          |           |             |
|          |           |             | tmin_11  | 5.03      | 3.03        |          |           |             |
|          |           |             | tmean_2  | 6.88      | 5.05        |          |           |             |
|          |           |             | tmax_6   | 21.69     | 24.07       |          |           |             |
|          |           |             | bio_17   | 125.29    | 91.57       |          |           |             |
|          |           |             | tmax_1   | 9.79      | 8.04        |          |           |             |
|          |           |             | s_clay   | 15.88     | 26.15       |          |           |             |

**Table S6.** Pearson correlation ( $p < 0.05$ ) between latency period and ecogeographical variables (see Table S1) evaluated for partial disease resistance to the Jerez Califa 13 isolate at seedling stage.

| Variable       | Variable | r value | p-value |
|----------------|----------|---------|---------|
| Latency period | tmin_2   | 0.61    | <0.0001 |
|                | tmin_1   | 0.60    | <0.0001 |
|                | tmin_3   | 0.60    | <0.0001 |
|                | bio_6    | 0.60    | <0.0001 |
|                | tmean_1  | 0.58    | <0.0001 |
|                | tmin_10  | 0.58    | <0.0001 |
|                | tmin_11  | 0.58    | <0.0001 |
|                | tmin_12  | 0.58    | <0.0001 |
|                | Alt      | -0.58   | <0.0001 |
|                | tmean_2  | 0.57    | <0.0001 |
|                | bio_11   | 0.57    | <0.0001 |
|                | tmin_4   | 0.57    | 0.0001  |
|                | tmean_12 | 0.56    | 0.0001  |
|                | tmin_5   | 0.56    | 0.0001  |
|                | bio_2    | -0.56   | 0.0001  |
|                | tmean_11 | 0.54    | 0.0001  |
|                | tmax_1   | 0.54    | 0.0001  |
|                | tmin_9   | 0.54    | 0.0001  |
|                | tmean_3  | 0.53    | 0.0002  |
|                | bio_7    | -0.53   | 0.0002  |
|                | tmax_12  | 0.51    | 0.0003  |
|                | tmean_10 | 0.51    | 0.0004  |
|                | prec_10  | 0.5     | 0.0005  |
|                | bio_4    | -0.49   | 0.0005  |
|                | tmin_6   | 0.48    | 0.0007  |
|                | tmax_2   | 0.48    | 0.0009  |
|                | tmean_4  | 0.47    | 0.0012  |
|                | bio_1    | 0.46    | 0.0015  |
|                | tmax_11  | 0.45    | 0.0017  |
|                | tmin_8   | 0.45    | 0.0021  |
|                | bio_13   | 0.43    | 0.0034  |
|                | tmean_5  | 0.43    | 0.0035  |
|                | bio_8    | 0.42    | 0.0043  |
|                | bio_16   | 0.41    | 0.0048  |
|                | tmin_7   | 0.41    | 0.0056  |
|                | tmax_3   | 0.39    | 0.0082  |
|                | prec_11  | 0.37    | 0.0113  |
|                | prec_12  | 0.37    | 0.0128  |
|                | prec_9   | 0.37    | 0.0131  |
|                | bio_19   | 0.36    | 0.0164  |
|                | tmax_10  | 0.35    | 0.0172  |
|                | prec_1   | 0.35    | 0.0191  |
|                | prec_2   | 0.34    | 0.0214  |
|                | bio_12   | 0.34    | 0.0237  |
|                | tmean_9  | 0.33    | 0.0279  |
|                | prec_3   | 0.3     | 0.0448  |

**Table S7.** Means of the ecogeographical variables (see Table S1) ordered according to their significant differences ( $p < 0.05$ ) between the two disease severity groups for yellow rust at the seedling stage.

| <b>Variable</b> | <b>Resistant</b> | <b>Susceptible</b> |
|-----------------|------------------|--------------------|
| bio_19          | 197.18           | 170.89             |
| prec_12         | 76.06            | 65.55              |
| bio_4           | 517.57           | 584.66             |
| bio_7           | 24.28            | 27.46              |

**Table S8.** Ecogeographical variables significantly different ( $p < 0.05$ ) between the origin sites of the agroecological zones 4 and 9.

| Variable | Zone 4 | Zone 9 |
|----------|--------|--------|
| prec_1   | 44.85  | 97.35  |
| prec_2   | 44.26  | 87.23  |
| prec_3   | 50.36  | 78.52  |
| prec_4   | 53.38  | 88.63  |
| prec_7   | 22.31  | 39.15  |
| prec_8   | 25.32  | 51.45  |
| prec_9   | 41.83  | 72.9   |
| prec_10  | 52.82  | 98.27  |
| prec_11  | 55.85  | 122.41 |
| prec_12  | 55.02  | 116.25 |
| tmean_1  | 3.11   | 7.6    |
| tmean_2  | 4.37   | 8.28   |
| tmean_3  | 7.11   | 10.07  |
| tmean_4  | 9.38   | 11.17  |
| tmean_7  | 20.94  | 18.63  |
| tmean_8  | 20.62  | 19.11  |
| tmean_10 | 11.76  | 14.17  |
| tmean_11 | 7      | 10.17  |
| tmean_12 | 4.16   | 8.31   |
| tmax_1   | 7.25   | 11.06  |
| tmax_2   | 9.23   | 11.86  |
| tmax_3   | 12.43  | 13.91  |
| tmax_6   | 24.07  | 21.08  |
| tmax_7   | 28.24  | 23.24  |
| tmax_8   | 27.69  | 23.85  |
| tmax_9   | 23.7   | 21.71  |
| tmax_11  | 11.71  | 13.99  |
| tmax_12  | 8.13   | 11.93  |
| tmin_1   | -0.98  | 4.18   |
| tmin_2   | -0.43  | 4.73   |
| tmin_3   | 1.84   | 6.27   |
| tmin_4   | 3.82   | 7.09   |
| tmin_5   | 7.06   | 9.77   |
| tmin_9   | 10.91  | 13.09  |
| tmin_10  | 6.39   | 10.09  |
| tmin_11  | 2.35   | 6.39   |
| tmin_12  | 0.24   | 4.74   |
| bio_1    | 11.34  | 12.95  |
| bio_2    | 11.16  | 8.1    |
| bio_3    | 37.67  | 40.55  |
| bio_4    | 621.1  | 405.15 |
| bio_5    | 28.26  | 23.85  |
| bio_6    | -0.98  | 4.17   |
| bio_7    | 29.25  | 19.68  |
| bio_11   | 3.85   | 8.03   |
| bio_12   | 554.9  | 979.42 |
| bio_13   | 66.56  | 130.27 |
| bio_14   | 21.95  | 39.15  |
| bio_16   | 179.17 | 341.52 |
| bio_17   | 88.63  | 146.87 |
| bio_18   | 93.57  | 163.5  |
| bio_19   | 144.13 | 300.83 |
| t_sand   | 36.86  | 42.4   |
| t_pH     | 7.28   | 5.8    |

**Table S9.** Means of the ecogeographical variables (see Table S1) ordered according to their significant differences ( $p < 0.05$ ) between the two disease severity groups for yellow rust at the adult stage in the field evaluation.

| Variable                                  | Resistant | Susceptible |
|-------------------------------------------|-----------|-------------|
| bio_13                                    | 107.78    | 63.05       |
| prec_11                                   | 99.92     | 53.32       |
| prec_4                                    | 73.07     | 50.07       |
| bio_12                                    | 820.09    | 511.21      |
| prec_10                                   | 82        | 52.47       |
| bio_16                                    | 293.92    | 169.28      |
| prec_1                                    | 83.63     | 42.68       |
| bio_19 (Precipitation of coldest quarter) | 257.48    | 138.08      |
| east                                      | -0.07     | 0.06        |
| prec_12 (December precipitation)          | 98.47     | 52.44       |
| prec_2                                    | 75.37     | 42.97       |
| bio_2                                     | 9.4       | 11.48       |
| tmax_7                                    | 25.72     | 29.49       |
| bio_7 (Annual temperature range)          | 24.07     | 29.51       |
| bio_5                                     | 25.99     | 29.49       |
| prec_3                                    | 74.38     | 48.05       |
| tmax_8                                    | 25.72     | 28.96       |
| bio_4 (Temperature seasonality)           | 505.38    | 618.67      |
| tmax_6                                    | 22.53     | 25.28       |
| bio_18                                    | 118.86    | 75.69       |
| prec_9                                    | 56.04     | 38.49       |
| t_pH                                      | 6.34      | 7.51        |
| tmax_9                                    | 22.62     | 24.99       |
| prec_8                                    | 34.54     | 20.11       |
| bio_6                                     | 1.92      | -0.02       |
| prec_5                                    | 67.7      | 55.2        |
| prec_7                                    | 27.42     | 16.43       |
| bio_14                                    | 27.42     | 16.43       |
| tmean_7                                   | 19.78     | 22.1        |
| bio_17                                    | 107.53    | 73.17       |
